# Supplementary material for: 3D Culture of Human Ovarian Tissue on Conductive Hybrid Scaffolds with and without Electrical Stimulation
Source: Research Square preprint supplement (doi:10.21203/rs.3.rs-7638995/v1), 2025-10-06
Supplement: Supplementary file 1 [file 0f5e71b2e45e72327ad04ca9.docx]

This study introduces a novel electroactive biomaterial strategy that meaningfully advances the field of ovarian tissue engineering by integrating conductive scaffold design with physiologically relevant electrical stimulation a combination not previously explored in human ovarian cortex culture. While 3D hydrogel systems (e.g., alginate, fibrin, Matrigel) have improved follicle survival over 2D platforms, and decellularized scaffolds or fragment-based cultures better preserve stromal context, none have incorporated bioelectrical cues to actively modulate stromal behavior and follicular progression in a controlled, biomimetic manner. Our PPy/Alg–CMC hybrid scaffold bridges this gap by providing not only structural and mechanical support but also dynamic electroconductivity enabling precise delivery of low-voltage stimulation that mimics endogenous bioelectric signaling in ovarian tissue.

The novelty lies not only in the material itself but in its functional synergy: the scaffold’s conductivity enables targeted activation of stromal cells toward a pro-regenerative, α-SMA⁺ phenotype —and ECM remodeling — while simultaneously promoting granulosa and follicular proliferation (Ki-67⁺) without inducing stress (p53⁻). This dual action — structural preservation + bioelectrical activation — creates a self-reinforcing niche that supports primordial-to-preantral follicle transition, a critical bottleneck in current in vitro systems.

Compared to existing platforms:

- Isolated follicle encapsulation (e.g., alginate beads): Allows follicle growth but severs stromal-paracrine networks, limiting long-term viability and developmental competence.

- Fragment culture in passive hydrogels: Maintains tissue context but offers no active stimulation to drive stromal reorganization or accelerate follicle activation.

Our system uniquely combines architectural fidelity, electroactive tunability, and biological responsiveness — features essential for clinical translation. The absence of fibrosis, apoptosis, or cytotoxicity under stimulation further underscores its safety profile for human tissue applications.

Looking ahead, key challenges include scaling up culture duration to support antral follicle development, integrating real-time monitoring of electrical and metabolic responses, and validating oocyte competence post-maturation. Future work should also compare this platform head-to-head with leading clinical-grade systems (e.g., fibrin-alginate composites, dynamic perfusion bioreactors) to quantify gains in follicle yield, hormone output, and epigenetic stability.

Ultimately, this research lays the foundation for a next-generation fertility preservation platform one that doesn’t just maintain ovarian tissue, but actively engineers its microenvironment to enhance regenerative potential. For pediatric cancer patients and women facing premature ovarian failure, such a system could transform in vitro culture from a passive holding strategy into an active developmental accelerator bringing us closer to reliable, clinically viable restoration of fertility.
